# Supplementary material for: Are contributions of emissions to ozone a matter of scale? – a study using MECO(n) (MESSy v2.50)
Source: Copernicus journal article supplement (doi:10.5194/gmd-13-363-2020), 2020-01-31
Supplement: Supplementary file 1 [file supplement.pdf › supplement.pdf]

# **Supplement to 'Are contributions of emissions to ozone a matter of scale?'**

Mariano Mertens  
Institut für Physik der Atmosphäre  
DLR-Oberpfaffenhofen

`mariano.mertens@dlr.de`

November 2019

## S1 Definition of the tagging categories

Table S1: Description of the different tagging categories applied in this study.

| tagging categories        | description                                                                                                                                           | notation for tagged ozone  |
|---------------------------|-------------------------------------------------------------------------------------------------------------------------------------------------------|----------------------------|
| land transport            | emissions of road traffic, inland navigation, railways (IPCC codes 1A3b.c.e)                                                                          | $O_3^{\text{tra}}$         |
| anthropogenic non-traffic | sectors energy, solvents, waste, industries, residential, agriculture                                                                                 | $O_3^{\text{ind}}$         |
| ship                      | emissions from ships (IPCC code 1A3d)                                                                                                                 | $O_3^{\text{shp}}$         |
| aviation                  | emissions from aircraft                                                                                                                               | $O_3^{\text{air}}$         |
| lightning                 | lightning $\text{NO}_x$ emissions                                                                                                                     | $O_3^{\text{lig}}$         |
| biogenic                  | on-line calculated isoprene and soil- $\text{NO}_x$ emissions, off-line emissions from biogenic sources and agricultural waste burning (IPCC code 4F) | $O_3^{\text{soi}}$         |
| biomass burning           | biomass burning emissions                                                                                                                             | $O_3^{\text{bio}}$         |
| $\text{CH}_4$             | degradation of $\text{CH}_4$                                                                                                                          | $O_3^{\text{CH}_4}$        |
| $\text{N}_2\text{O}$      | degradation of $\text{N}_2\text{O}$                                                                                                                   | $O_3^{\text{N}_2\text{O}}$ |
| stratosphere              | downward transport from the stratosphere                                                                                                              | $O_3^{\text{str}}$         |

## S2 Supplementary information

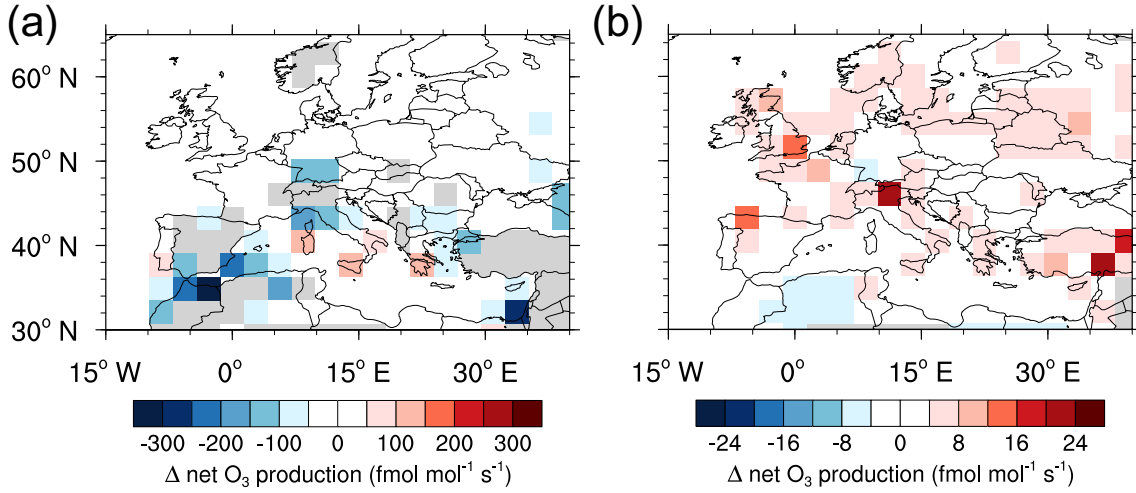

Figure S1:  $\Delta \text{P}_{\text{O}_3}$  calculated for JJA 2008–2010 at (a) 950 hPa and (b) 700 hPa (in  $\text{fmol mol}^{-1} \text{s}^{-1}$ ). The CM50 data have been transformed on the horizontal and vertical grid of EMAC. Grey areas indicate missing values.

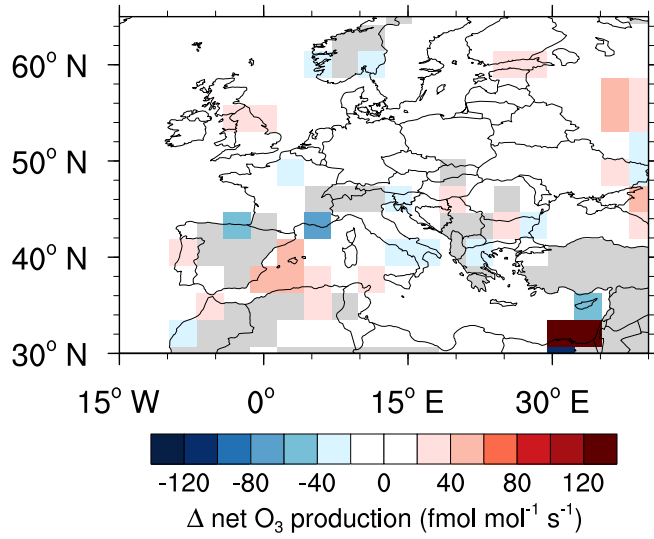

Figure S2:  $\Delta \text{P}_{\text{O}_3}^{ET42}$  'MINUS'  $\Delta \text{P}_{\text{O}_3}^{REF}$  calculated for JJA 2008 at 950 hPa (in  $\text{fmol mol}^{-1} \text{s}^{-1}$ ). The CM50 data have been transformed on the horizontal and vertical grid of EMAC. Grey areas indicate missing values.

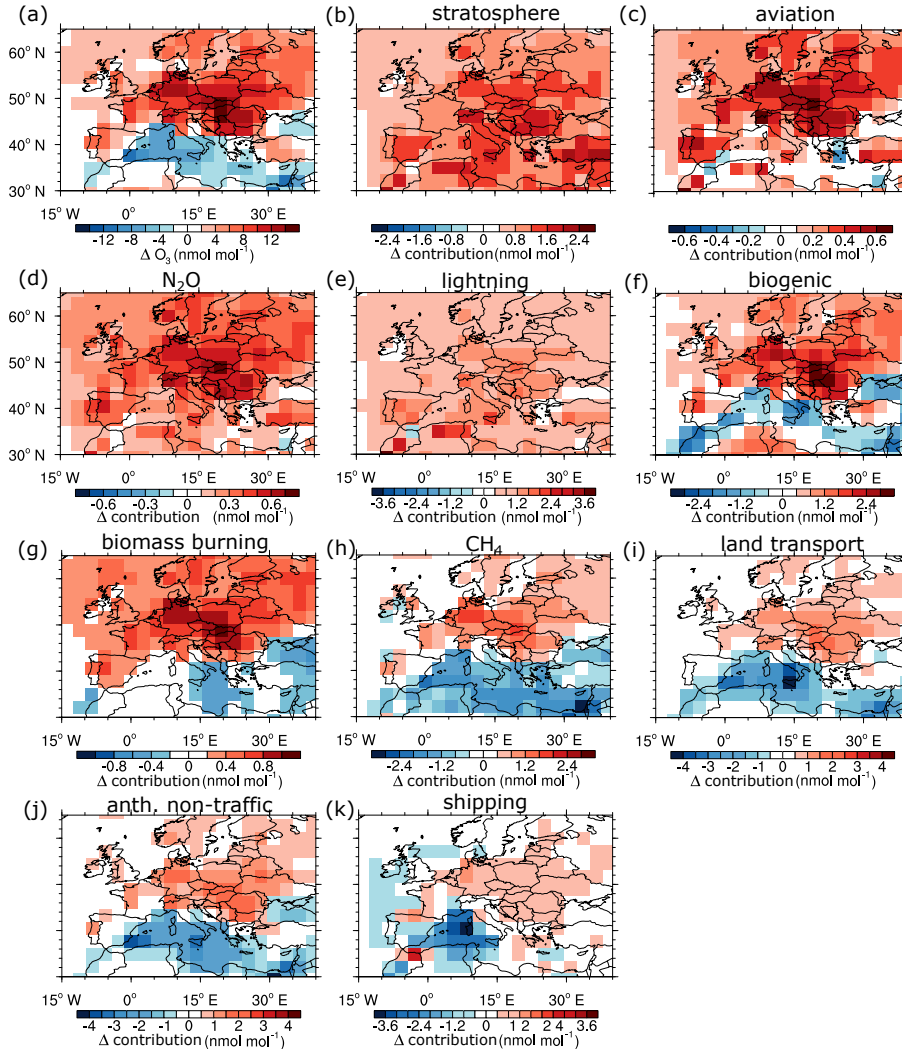

Figure S3: Differences ('CM50 MINUS EMAC') of the JJA averaged ground-level ozone values (a) and absolute contributions to groundlevel O<sub>3</sub> (in nmol mol<sup>-1</sup>) of the categories: (b) stratosphere, (c) aviation, (d) N<sub>2</sub>O, (e) lightning, (f) biogenic, (g) biomass burning degradation, (h) aviation, (i) land transport, (j) anthropogenic non-traffic, and (k) shipping. Shown are the results of the *REF* simulation, averaged for JJA 2008–2010. The CM50 data were transformed onto the horizontal grid of EMAC.

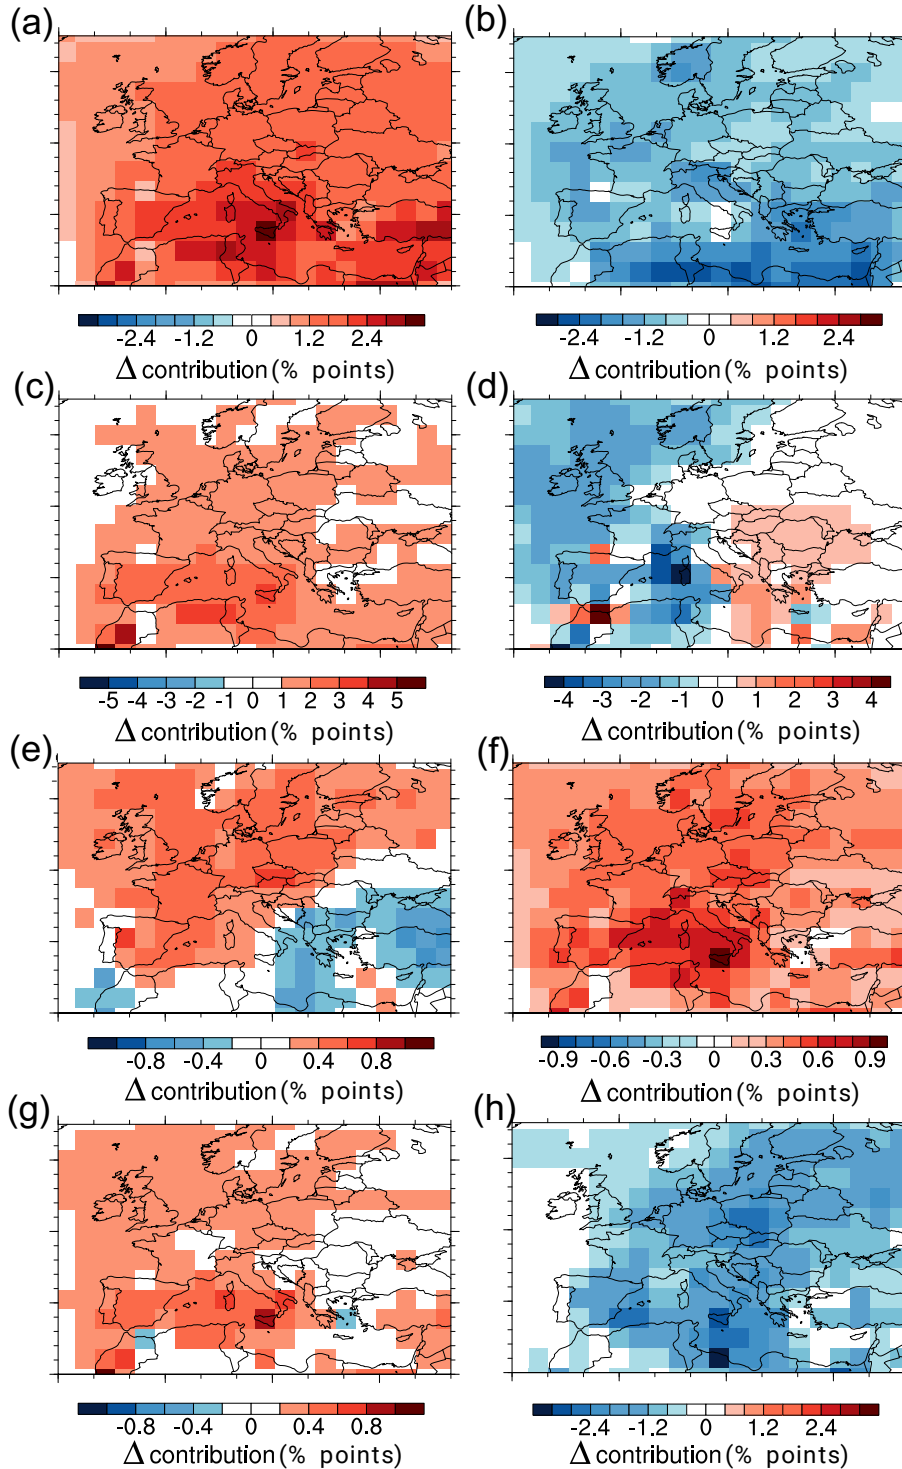

Figure S4: Differences ('CM50 MINUS EMAC') of the JJA averaged relative contributions to groundlevel O<sub>3</sub> (in percentage points) of the categories: (a) stratosphere, (b) methane degradation, (c) lightning, (d) shipping, (e) biomass burning, (f) N<sub>2</sub>O degradation, (g) aviation and (h) anthropogenic non-traffic. Shown are the results of the *REF* simulation, averaged for JJA 2008–2010. The CM50 data were transformed onto the horizontal grid of EMAC.

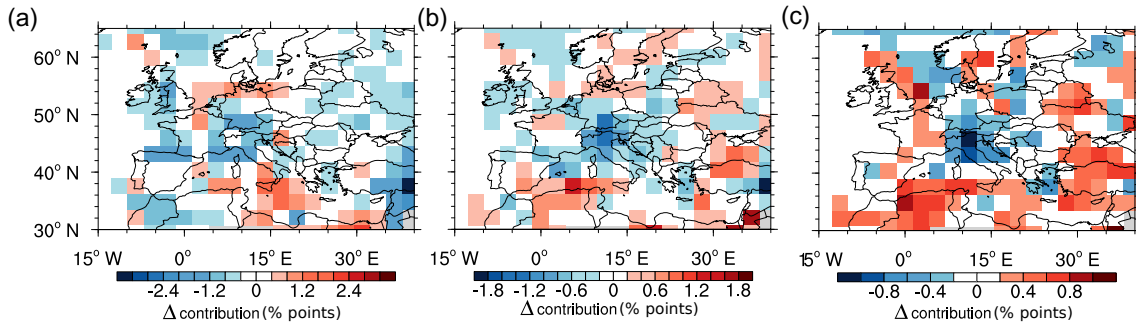

Figure S5: Difference ('CM50 MINUS EMAC') of the relative contribution of  $O_3^{\text{tra}}$  to ozone at (a) 800 hPa, (b) 700 hPa and (c) 600 hPa (in percentage points). The CM50 results are transformed onto the EMAC grid. Shown are the results of the *REF* simulation, averaged for JJA 2008–2010.

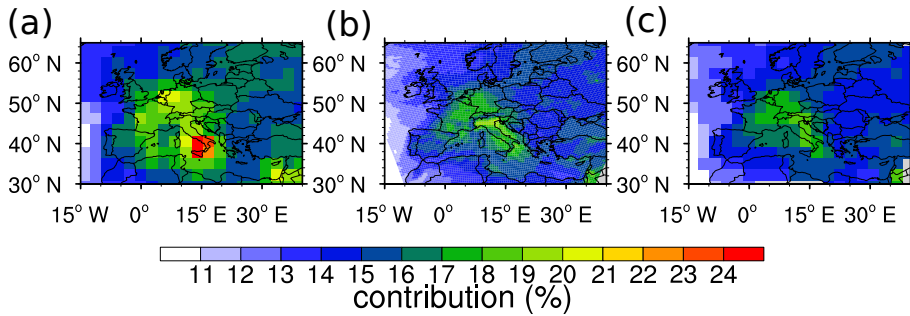

Figure S6: 95th percentile of the contribution of  $O_3^{\text{tra}}$  to ground-level  $O_3$  (for JJA between 9–18 UTC) for (a) EMAC, (b) CM50 and (c) CM50 transformed onto the EMAC grid (CM50<sub>E</sub>).

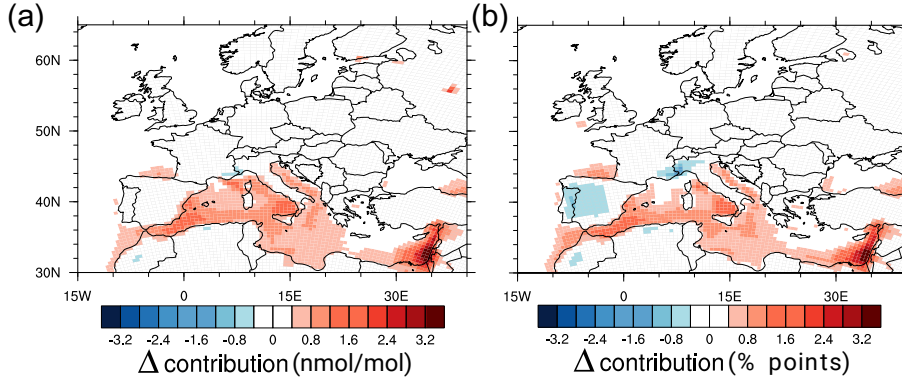

Figure S7: Difference ('*ET42* MINUS *REF*') of the absolute ((a), in  $\text{nmol mol}^{-1}$  and relative (b) in percentage points) contribution of  $\text{O}_3^{\text{tra}}$  to ground-level ozone. Shown are the results of CM50 for JJA 2008.

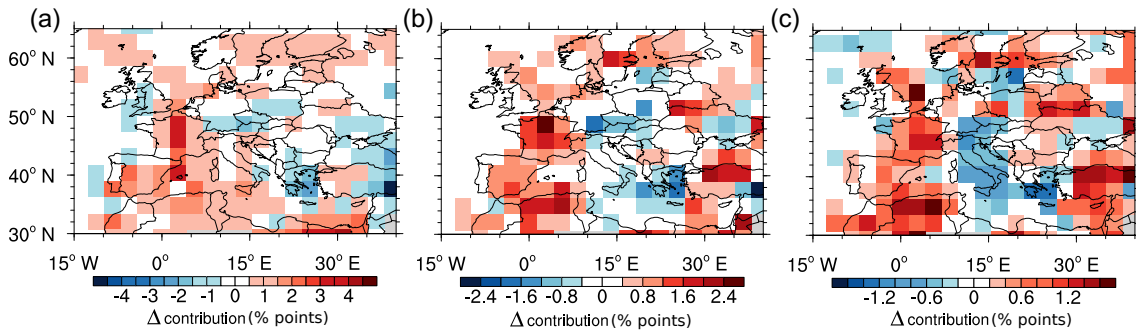

Figure S8: Difference ('*CM50* MINUS *EMAC*') of the relative contribution of  $\text{O}_3^{\text{soi}}$  to ozone at (a) 800 hPa, (b) 700 hPa, and (c) 600 hPa, (in percentage points). The CM50 results are transformed onto the EMAC grid. Shown are the results of the *REF* simulation, averaged for JJA 2008–2010.



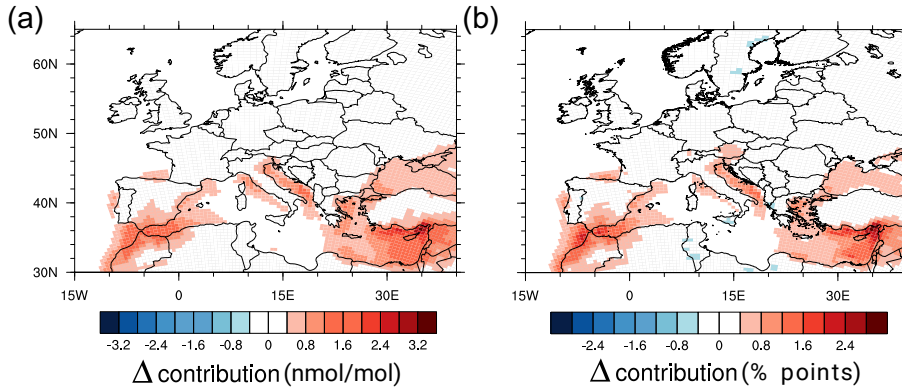

Figure S9: Difference ('*EBIO* MINUS *REF*') of the absolute ((a), in nmol mol<sup>-1</sup> and relative (b) in percentage points) contribution of  $O_3^{\text{soi}}$  to ground-level ozone. Shown are the results of CM50 for JJA 2008.

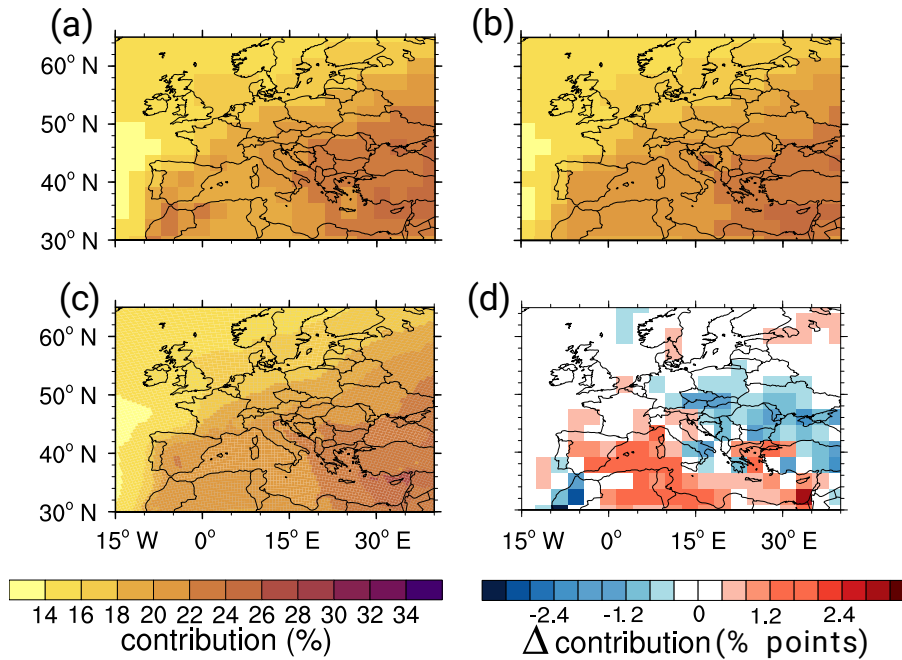

Figure S10: Comparison of the JJA averaged ground-level contribution of  $O_3^{\text{soi}}$  to  $O_3$  (in %) of EMAC and CM50: (a) results of EMAC, (b) results of CM50 transformed onto the EMAC grid, (c) results of CM50 on the original grid and (d) difference ('CM50 MINUS EMAC' in percentage points) on the coarse grid. (a)–(c) use the same (left) colour bar. Shown are the results of the *EBIO* simulation for 2008.

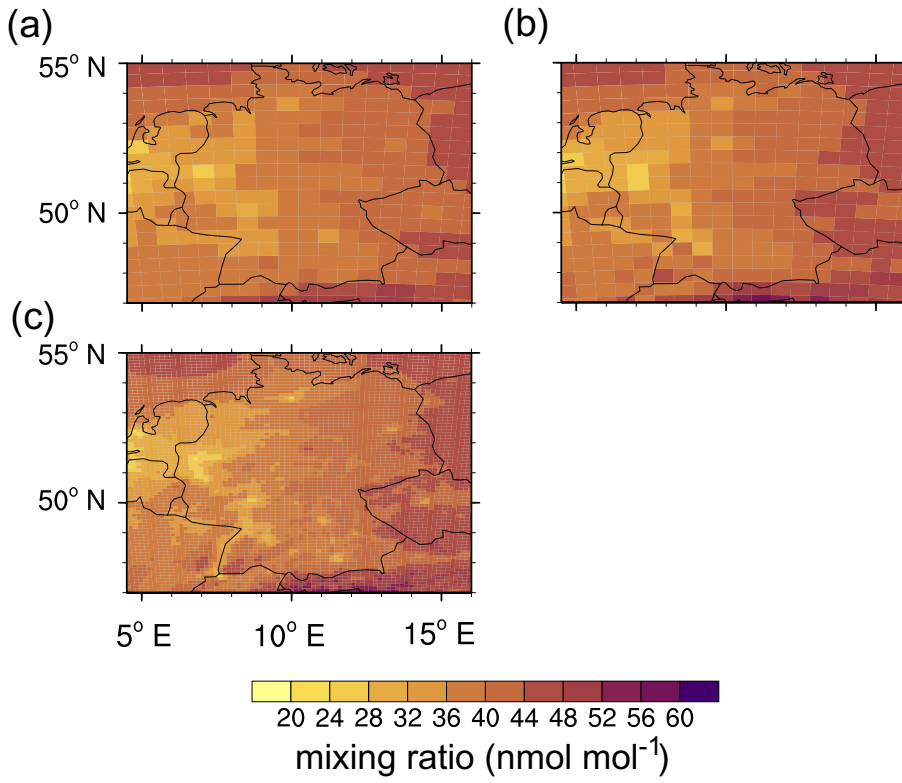

Figure S11: Ground-level ozone mixing ratios averaged for JJA 2008. (a) The values of CM50, (b) the values of CM12 transformed onto the CM50 grid and (c) the CM12 values on the original grid. Results are from the *EVEU* simulation.

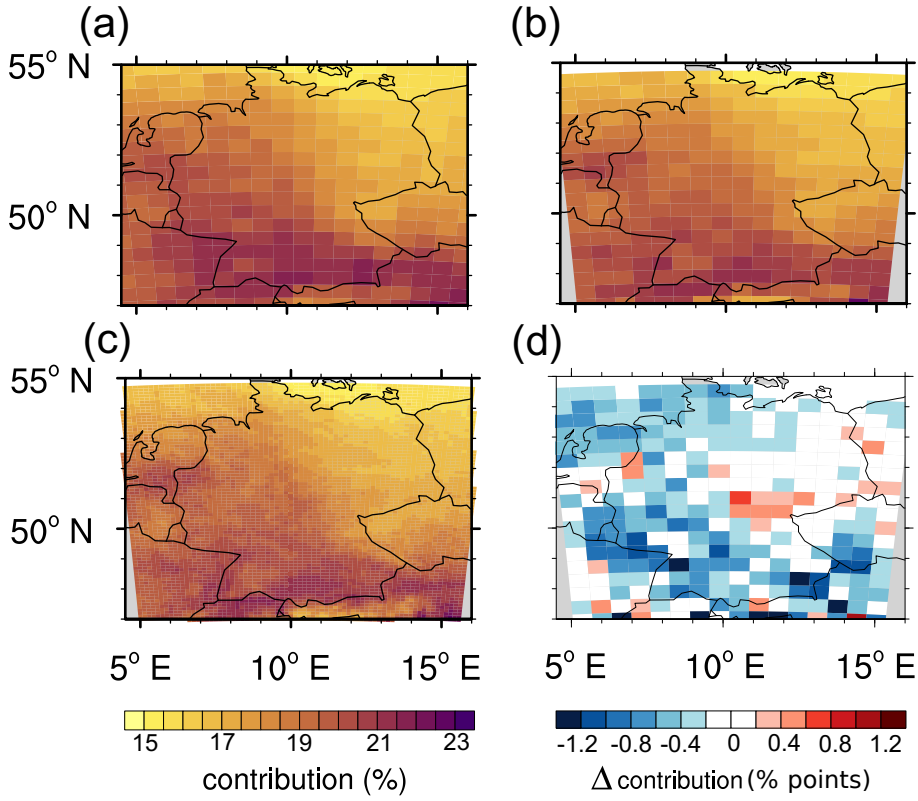

Figure S12: 95th percentile of the relative contribution of  $O_3^{\text{tra}}$  to ground-level  $O_3$  (for JJA between 9–18 UTC) for (a) CM50, (b) CM12 transformed onto the CM50 grid, (c) CM50, and (d) the difference between CM50 and CM12 ('CM12 MINUS CM50').

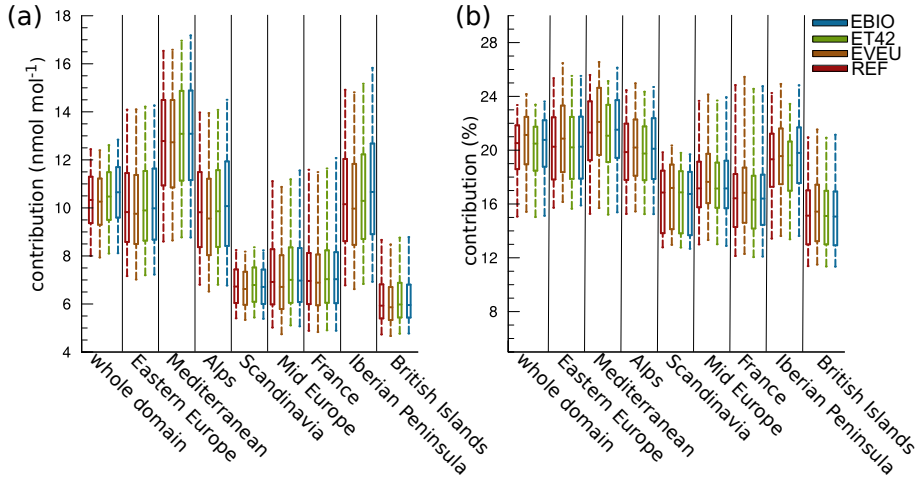

Figure S13: Comparison of the contributions of  $O_3^{soi}$  to ground-level ozone for JJA 2008 between the four simulations. (a) displays the absolute contribution in  $\text{nmol mol}^{-1}$  and (b) the relative contribution to ground-level ozone (in %). All values are area averaged over the respective region and are calculated using the results of the CM50 instance. The lower and upper end of the box indicate the 25th and 75th percentile, respectively, the bar the median, and the whiskers the 5th and 95th percentile of the timeseries for the JJA values from 2008 based on 3-hourly model output.

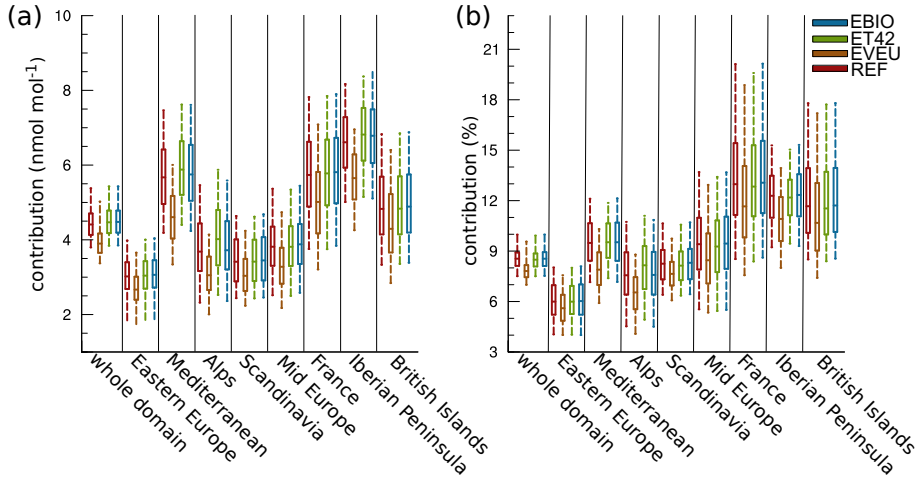

Figure S14: Comparison of the contributions of  $\text{O}_3^{\text{shp}}$  to ground-level ozone for JJA 2008 between the four simulations. (a) displays the absolute contribution in  $\text{nmol mol}^{-1}$  and (b) the relative contribution to ground-level ozone (in %). All values are area averaged over the respective region and are calculated using the results of the CM50 instance. The lower and upper end of the box indicate the 25th and 75th percentile, respectively, the bar the median, and the whiskers the 5th and 95th percentile of the timeseries for the JJA values from 2008 based on 3-hourly model output.

Table S2: Root-mean-square error (RMSE, in  $\mu\text{g m}^{-3}$  and normalized mean-bias error (MBE, in %) of  $\text{O}_3$  for CM50 and CM12 in comparison to ground-level observations. Shown are the averaged values for June to August 2008 for all stations located in the CM12 domain. The values are calculated from monthly mean values. The model values are height corrected as discussed in detail by Mertens et al. (2016).

|             | RMSE (in $\mu\text{g m}^{-3}$ ) |       | MB (in %) |       |
|-------------|---------------------------------|-------|-----------|-------|
|             | CM50                            | CM12  | CM50      | CM12  |
| <i>REF</i>  | 15.68                           | 15.43 | 10.89     | 13.98 |
| <i>EVEU</i> | 14.96                           | 14.03 | 6.82      | 11.15 |

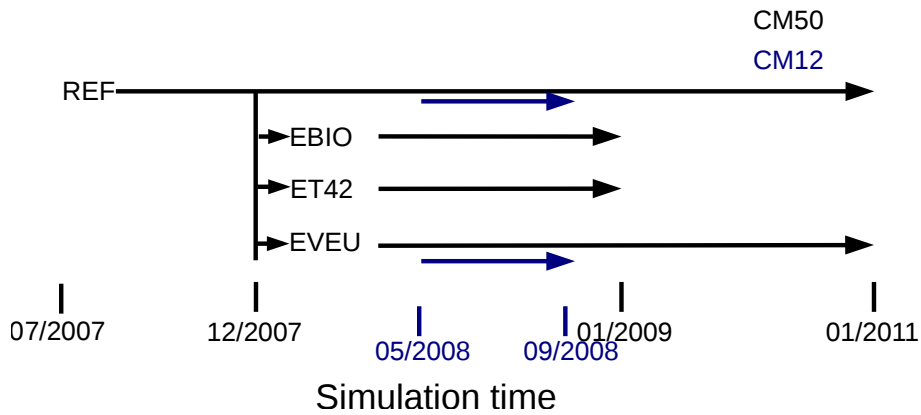

Figure S15: Sketch visualising the simulation period of the individual simulations. All simulations were branched off from the *REF* simulations. The black arrows indicate the simulation period of the CM50 instance, blue indicates the periods where additionally also the CM12 model instance was activated.

### S3 Total emissions of the different simulations

The following Tables summaries the emissions of NO<sub>x</sub>, CO and VOCs from all anthropogenic and natural sources applied in the different simulations. Please note, that for every specie only these emission sectors are given where emissions occur. These sector are:

- **road t.:** Road traffic emissions
- **anth. nt:** Anthropogenic non-traffic emissions
- **shipping:** Shipping emissions
- **aviation:** Aviation emissions
- **Soil-NO<sub>x</sub>:** NO<sub>x</sub> emissions from soils calculated by the model
- **LNOX:** Lightning NO<sub>x</sub> emissions
- **AWB:** Agricultural waste burning emissions
- **BB :** Biomass burning emissions
- **biog.:** Further biogenic emissions, not calculated by the model but prescribed as annual climatology
- **biog.** C<sub>5</sub>H<sub>8</sub>: Biogenic isoprene emissions, calculated by the model

Tables S3–S5 give the total emissions of EMAC of NO<sub>x</sub>, CO and VOC, respectively. Tables S6–S8 give the total emissions of CM50 and Table S9–S11 of CM12. Please note, that the emissions of C<sub>5</sub>H<sub>8</sub> from biogenic origin listed in the tables are already scaled with factors of 0.6 (EMAC and COSMO-CLM/MESSy for the *EBIO* simulation) and 0.45 (COSMO-CLM/MESSy).

Table S3: Total emissions of NO<sub>x</sub> (in Tg a<sup>-1</sup> in amount of NO) for EMAC. Given are the annual totals for the year 2008.

| Simulation | road t. | anth.<br>nt | shipping | aviation | Soil<br>NO <sub>x</sub> | LNOX | AWB   | BB   | Sum  |
|------------|---------|-------------|----------|----------|-------------------------|------|-------|------|------|
| REF        | 20.4    | 36.9        | 12.7     | 2.14     | 12.5                    | 12.1 | 0.416 | 9.47 | 97.2 |
| ET42       | 20.4    | 36.9        | 12.7     | 2.14     | 12.5                    | 12.1 | 0.416 | 9.47 | 97.2 |
| EBIO       | 20.4    | 36.9        | 12.7     | 2.14     | 12.5                    | 12.1 | 0.416 | 9.47 | 97.2 |
| EVEU       | 20.4    | 36.9        | 12.7     | 2.14     | 12.5                    | 12.1 | 0.416 | 9.47 | 97.2 |

Table S4: Total emissions of CO (in Tg a<sup>-1</sup>) for EMAC. Given are the annual totals for the year 2008.

| Simulation | road t. | anth.<br>nt | shipping | AWB  | biog. | BB  | Sum  |
|------------|---------|-------------|----------|------|-------|-----|------|
| REF        | 153     | 412         | 1.33     | 20.2 | 113   | 328 | 1030 |
| ET42       | 153     | 412         | 1.33     | 20.2 | 113   | 328 | 1030 |
| EBIO       | 153     | 412         | 1.33     | 20.2 | 113   | 328 | 1030 |
| EVEU       | 153     | 412         | 1.33     | 20.2 | 113   | 328 | 1030 |

Table S5: Total emissions of VOC (in Tg a<sup>-1</sup> in amount of C) for EMAC. Given are the annual totals for the year 2008.

| Simulation | road t. | anth.<br>nt | shipping | biog. C <sub>5</sub> H <sub>8</sub> | AWB   | biog. | BB   | Sum |
|------------|---------|-------------|----------|-------------------------------------|-------|-------|------|-----|
| REF        | 17.5    | 73.4        | 2.19     | 270                                 | 0.943 | 108   | 14.5 | 667 |
| ET42       | 17.5    | 73.4        | 2.19     | 270                                 | 0.943 | 108   | 14.5 | 667 |
| EBIO       | 17.5    | 73.4        | 2.19     | 270                                 | 0.943 | 108   | 14.5 | 667 |
| EVEU       | 17.5    | 73.4        | 2.19     | 270                                 | 0.943 | 108   | 14.5 | 667 |

Table S6: Total emissions of NO<sub>x</sub> (in Tg a<sup>-1</sup> in amount of NO) for CM50. Given are the annual totals for the year 2008.

| Simulation | road t. | anth.<br>nt | shipping | aviation | Soil<br>NO <sub>x</sub> | LNOX  | AWB    | BB    | Sum  |
|------------|---------|-------------|----------|----------|-------------------------|-------|--------|-------|------|
| REF        | 5.19    | 7.6         | 2.35     | 0.595    | 1.57                    | 0.715 | 0.0762 | 0.28  | 18.4 |
| ET42       | 5.20    | 7.65        | 2.35     | 0.591    | 1.57                    | 0.715 | 0.0762 | 0.276 | 18.4 |
| EBIO       | 5.20    | 7.65        | 2.35     | 0.591    | 1.66                    | 0.715 | 0.0762 | 0.276 | 18.5 |
| EVEU       | 5.35    | 5.08        | 1.81     | 0.534    | 1.57                    | 0.715 | 0.0762 | 0.28  | 15.4 |

Table S7: Total emissions of CO (in Tg a<sup>-1</sup>) for CM50. Given are the annual totals for the year 2008.

| Simulation | road t. | anth.<br>nt | shipping | AWB  | biog. | BB   | Sum  |
|------------|---------|-------------|----------|------|-------|------|------|
| REF        | 30.9    | 28.7        | 0.241    | 2.89 | 4.84  | 8.87 | 76.4 |
| ET42       | 30.9    | 28.9        | 0.246    | 2.88 | 4.84  | 9.03 | 76.8 |
| EBIO       | 30.9    | 28.9        | 0.246    | 2.88 | 4.84  | 9.03 | 76.8 |
| EVEU       | 23.6    | 3.1         | 0.299    | 2.89 | 4.84  | 8.87 | 43.6 |

Table S8: Total emissions of VOC (in Tg a<sup>-1</sup> in amount of C) for CM50. Given are the annual totals for the year 2008.

| Simulation | road t. | anth.<br>nt | shipping | biog. C <sub>5</sub> H <sub>8</sub> | AWB    | biog. | BB    | Sum  |
|------------|---------|-------------|----------|-------------------------------------|--------|-------|-------|------|
| REF        | 3.29    | 14.2        | 0.343    | 14.3                                | 0.0994 | 4.59  | 0.377 | 54.7 |
| ET42       | 3.31    | 14.4        | 0.351    | 14.3                                | 0.0994 | 4.59  | 0.377 | 54.9 |
| EBIO       | 3.29    | 14.4        | 0.351    | 20.3                                | 0.0994 | 4.59  | 0.377 | 56.7 |
| EVEU       | 3.39    | 6.56        | 0.0954   | 14.3                                | 0.0994 | 4.59  | 0.377 | 46.9 |



Table S9: Total emissions of NO<sub>x</sub> (in Tg in amount of NO) for CM12. Given are the annual totals for the May–August 2008.

| Simulation | road t. | anth.<br>nt | shipping | aviation | Soil<br>NO <sub>x</sub> | LNOX   | AWB      | BB      | Sum   |
|------------|---------|-------------|----------|----------|-------------------------|--------|----------|---------|-------|
| REF        | 0.342   | 0.335       | 0.0333   | 0.0642   | 0.167                   | 0.0456 | 0.000761 | 0.00361 | 0.988 |
| EVEU       | 0.441   | 0.277       | 0.0263   | 0.0555   | 0.167                   | 0.0456 | 0.000761 | 0.00361 | 1.01  |

Table S10: Total emissions of CO (in Tg) for CM12. Given are the annual totals for the May–August 2008.

| Simulation | road t. | anth.<br>nt | shipping | AWB    | biog. | BB   | Sum  |
|------------|---------|-------------|----------|--------|-------|------|------|
| REF        | 1.27    | 1.41        | 0.00348  | 0.0333 | 4.81  | 0.12 | 7.65 |
| EVEU       | 1.18    | 0.842       | 0.000719 | 0.0333 | 4.81  | 0.12 | 6.98 |

Table S11: Total emissions of VOC (in Tg in amount of C) for CM12. Given are the annual totals for the May–August 2008.

| Simulation | road t. | anth.<br>nt | shipping | biog. C <sub>5</sub> H <sub>8</sub> | AWB    | biog. | BB      | Sum  |
|------------|---------|-------------|----------|-------------------------------------|--------|-------|---------|------|
| REF        | 0.141   | 0.538       | 0.00413  | 0.190                               | 0.0111 | 0.372 | 0.00516 | 1.49 |
| EVEU       | 0.143   | 0.383       | 0.00175  | 0.190                               | 0.0111 | 0.372 | 0.00516 | 1.34 |

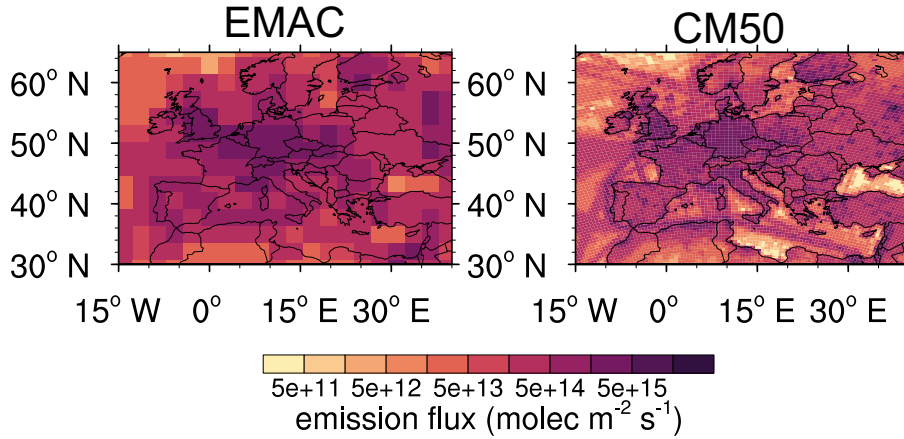

Figure S16: Annual averaged emissions flux (in  $\text{molec m}^{-2} \text{s}^{-1}$ ) of NO<sub>x</sub> due to all anthropogenic emission sources (land transport, anthropogenic non-traffic, shipping; *REF* simulation) for EMAC and CM50.

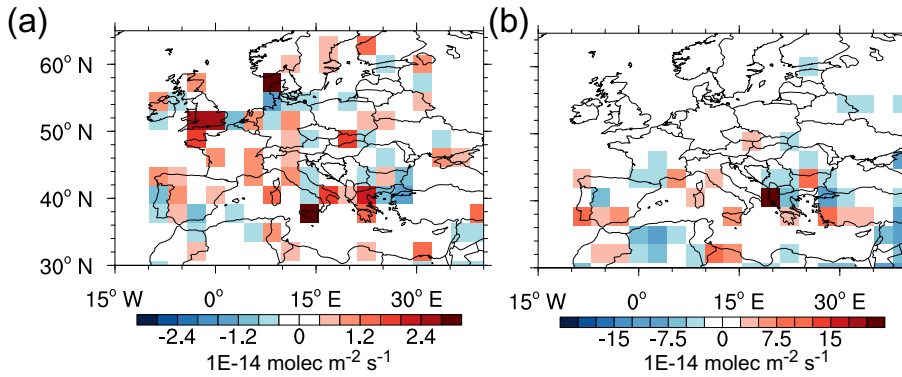

Figure S17: Difference ('EMAC MINUS CM50') of the on-line calculated (a) soil-NO<sub>x</sub> and (b) isoprene emission flux (in  $1 \text{E-}14 \text{ molec m}^{-2} \text{s}^{-1}$ ). The CM50 results are transformed onto the EMAC grid. Shown are the results of the *REF* simulation, averaged for JJA 2008–2010. Please note that the different scaling factors of the isoprene emissions in EMAC and CM50 are not considered.

## S4 List of used stations

Table S12: Overview of stations from the EMEP network used for the comparison.

| Name                | lat (in °) | lon (in °) | height (in m) | variable |
|---------------------|------------|------------|---------------|----------|
| Aliartos            | 38.37      | 23.08      | 110           | O3       |
| Ayia Marina         | 35.04      | 33.06      | 532           | O3       |
| Barcorotta          | 38.48      | -6.92      | 393           | O3,      |
| Birkesens           | 58.38      | 8.25       | 190           | O3       |
| Eupen               | 50.63      | 6.00       | 295           | O3       |
| Forsthof            | 48.11      | 15.92      | 581           | O3       |
| Giordon Lighthouse  | 36.07      | 14.22      | 167           | O3       |
| Graz Platte         | 47.11      | 15.47      | 651           | O3       |
| Iskraba             | 45.57      | 14.87      | 520           | O3       |
| Ispra               | 45.80      | 8.63       | 209           | O3       |
| Jarczew             | 51.82      | 21.98      | 180           | O3       |
| Jungfrauoch         | 46.54      | 7.98       | 3578          | O3       |
| La Coulande         | 48.63      | -0.45      | 304           | O3       |
| Ladybower Research  | 53.40      | -1.75      | 420           | O3       |
| Lahemaa             | 59.50      | 25.90      | 32            | O3       |
| Lazaropole          | 41.54      | 20.69      | 1332          | O3       |
| Le Casset           | 45.00      | 6.47       | 1790          | O3       |
| Lullington Heathrow | 50.79      | 0.18       | 120           | O3       |
| Mace Head           | 53.17      | -9.50      | 15            | O3       |
| Montellipreti       | 42.10      | 12.63      | 48            | O3       |
| Narberth            | 51.78      | -4.69      | 160           | NO2      |
| Neuglobsow          | 53.17      | 13.03      | 62            | O3       |
| Niembro             | 43.44      | -4.85      | 134           | O3       |
| Noraa-Kvill         | 57.82      | 15.57      | 261           | O3       |
| Pic du Midi         | 42.94      | 0.14       | 2887          | O3       |
| Preila              | 55.35      | 21.06      | 5             | O3       |
| Puy de Dome         | 45.77      | 2.95       | 1468          | O3       |
| Revin               | 49.90      | 4.63       | 390           | O3       |
| Rojen Peak          | 41.70      | 24.74      | 1750          | O3       |
| Rucava              | 56.16      | 21.17      | 18            | O3       |
| Schmücke            | 50.65      | 10.77      | 937           | O3       |
| Starina             | 49.05      | 22.27      | 345           | O3       |
| Sulzberg            | 47.53      | 9.93       | 1020          | O3       |
| Ulborg              | 56.28      | 8.43       | 10            | O3       |
| Vilsandi            | 58.38      | 21.81      | 6             | O3       |
| Vizna               | 37.23      | -3.53      | 1296          | O3       |
| Westerland          | 54.93      | 8.31       | 12            | O3       |
| Zingst              | 54.43      | 12.73      | 1             | O3       |
| Zoesni              | 57.14      | 25.91      | 188           | O3       |

Table S13: Overview of stations providing vertical ozone profiles used for comparison. The last column shows for which variables the station data were used.

| Name            | lat (in °) | lon (in °) | height (in m) | variable |
|-----------------|------------|------------|---------------|----------|
| De Bilt         | 52.10      | 5.18 E     | 2             | O3       |
| Hohenpeisenberg | 47.80      | 11.01      | 985           | O3       |
| Leginowo        | 52.40      | 29.97      | 96            | O3       |
| Lindenberg      | 52.22      | 14.11      | 112           | O3       |
| Madrid          | 40.45      | 3.72       | 680           | O3       |
| Payerne         | 46.81      | 6.94       | 490           | O3       |
| Uccle           | 50.80      | 4.36       | 100           | O3       |
| Valentia        | 51.94      | 10.25      | 14            | O3       |

## References

- M. Mertens, A. Kerkweg, P. Jöckel, H. Tost, and C. Hofmann. The 1-way on-line coupled model system meco(n) – part 4: Chemical evaluation (based on messy v2.52). *Geosci. Model Dev.*, 9(10):3545–3567, 2016. doi: 10.5194/gmd-9-3545-2016. URL <http://www.geosci-model-dev.net/9/3545/2016/>.
