# Supplementary material for: Are contributions of emissions to ozone a matter of scale? – a study using MECO(n) (MESSy v2.50)
Source: Copernicus journal article supplement (doi:10.5194/gmd-13-363-2020), 2020-01-31
Supplement: Supplementary file [file gmd-13-363-2020-supplement-title-page.pdf › gmd-13-363-2020-supplement-title-page.pdf]

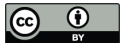

## *Supplement of*

# **Are contributions of emissions to ozone a matter of scale? – a study using MECO(n) (MESSy v2.50)**

**Mariano Mertens et al.**

*Correspondence to:* Mariano Mertens ([mariano.mertens@dlr.de](mailto:mariano.mertens@dlr.de))

- [gmd-13-363-2020-supplement-title-page.pdf](#)
- data
  - .directory
  - 1d\_cm50\_reg\_850\_08\_09\_10\_jja.nc
  - 1d\_emac\_reg\_850\_08\_09\_10\_jja.nc
  - data\_fig2a.nc
  - data\_fig2b.nc
  - metadata.txt
  - ref\_2008\_jja\_reg\_timeseries\_cm50.nc
  - refbio\_2008\_jja\_reg\_timeseries\_cm50.nc
  - s1\_2008\_jja\_reg\_timeseries\_cm50.nc
  - s4\_2008\_jja\_reg\_timeseries\_cm50.nc
  - ymonmean\_mlev\_rc1sd-eu07\_b0\_3h\_tag\_20082010\_ml\_klev31.nc
  - ymonmean\_mlev\_rc1sd-eu07\_b0\_tr\_tag\_20082010\_ml\_kelv40.nc
  - ymonmean\_mlev\_rc1sd-eu07\_s1\_tr\_tag\_20082008\_ml\_cm12\_klev40.nc
  - ymonmean\_mlev\_rc1sd-eu07\_s1\_tr\_tag\_20082008\_ml\_cm50\_kelv40.nc
- [meccanism\\_mecca.pdf](#)
- [meccanism\\_scav.pdf](#)
- setups
  - RC1-base-eu07\_wl-qctm\_2w\_REF.zip
  - RC1-base-eu07\_wl-sen1\_qctm\_2w\_EVEU.zip
  - RC1-base-eu07\_wl-sen4\_qctm\_2w\_REFT42.zip
  - RC1-base-eu07a\_wl-qctm\_2w\_REFbio.zip
- [supplement.pdf](#)

The copyright of individual parts of the supplement might differ from the CC BY 4.0 License.
